# Supplementary material for: Carbon nanospheres for fluorescent biomolecular detection
Source: Royal Society of Chemistry journal article supplement (doi:10.1039/c0jm04107f), 2011-01-01
Supplement: c0jm04107f.pdf [file c0jm04107f.pdf]

## Electronic Supplementary Information

### Carbon nanospheres for fluorescent biomolecular detection

Hailong Li,<sup>abc</sup> Yingwei Zhang,<sup>ac</sup> Tongshun Wu,<sup>ac</sup> Sen Liu,<sup>a</sup> Lei Wang<sup>a</sup> and Xuping

Sun<sup>\*a</sup>

<sup>a</sup>State Key Lab of Electroanalytical Chemistry, Changchun Institute of Applied Chemistry, Chinese Academy of Sciences, Changchun 130022, Jilin, China

<sup>b</sup>Graduate School of the Chinese Academy of Sciences, Beijing 100039, China

<sup>c</sup>H. Li, T. Wu and Y. Zhang contributed equally to this work.

\*To whom correspondence should be addressed. Tel/Fax: (+86) 431-85262065;

E-mail: sunxp@ciac.jl.cn

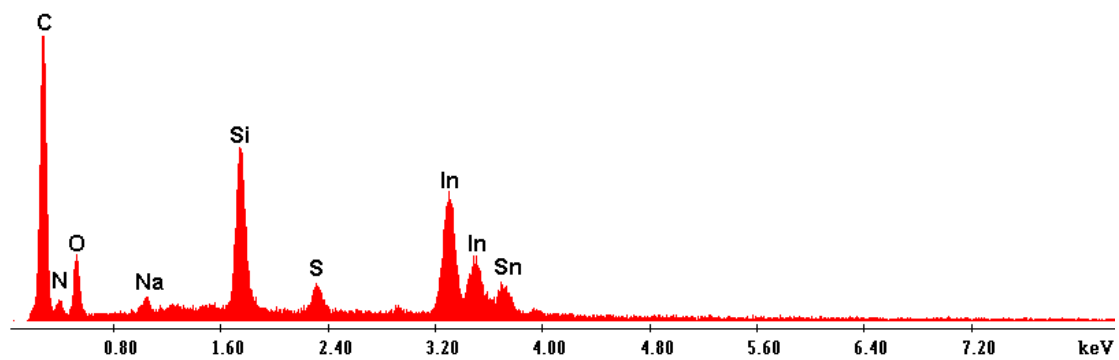

**Fig. S1** The EDS spectrum of the products thus formed.

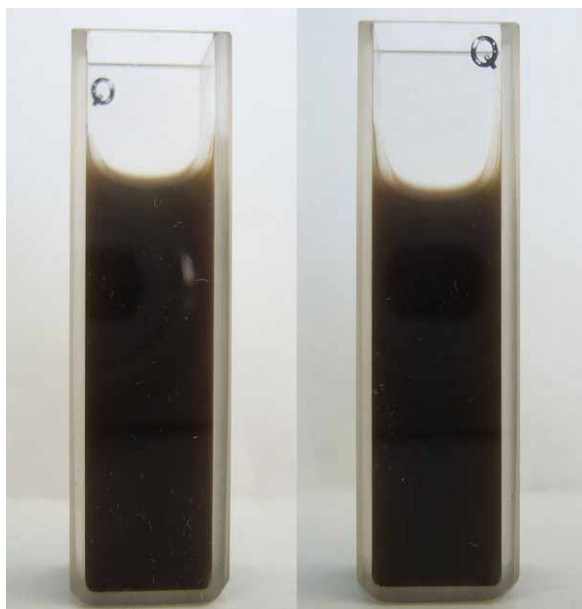

**Fig. S2** Photographs of CNS dispersion in water after storage at room temperature for one week (left) and one month (right), respectively.
